# Supplementary material
Source: HighWire-hosted journal article supplement (https://heart.bmj.com/content/102/24/1980)
Supplement: inline-supplementary-material-1 [file inline-supplementary-material-1.pdf]

1 **Infarct size and left ventricular remodelling after preventive percutaneous**  
2 **coronary intervention.**

3 **Supplementary Methods**

4 **Study Design**

5 Treatment assignment was determined by randomisation in the cardiac catheter  
6 laboratory in patients with TIMI grade 3 coronary flow in the culprit artery following  
7 primary PCI. Patients with one or more non-culprit artery stenoses  $\geq 50\%$  of the  
8 reference vessel diameter by visual assessment were invited to participate and  
9 following informed consent, were randomly allocated to either culprit-artery only PCI  
10 or multivessel preventive PCI. The randomisation strategy was stratified by site.

11 Any patient with subsequent symptoms of angina that were not controlled with the  
12 use of medical therapy was required to undergo an objective assessment of ischaemia  
13 to secure a diagnosis of refractory angina. Further PCI for angina was performed only  
14 in cases of refractory angina.

15 **Cardiac magnetic resonance imaging-supplementary information.**

16 Following the initiation of the Golden Jubilee National Hospital as a site in the  
17 PRAMI trial (February 2009), a protocol amendment for CMR was approved by the  
18 UK National Research Ethics Service. We therefore performed a prospective pre-  
19 specified CMR sub-study involving the trial participants who were randomised at the  
20 Golden Jubilee National Hospital, Clydebank, and at the Freeman Hospital,

21 Newcastle upon Tyne, between May 2009 and December 2012. The duration of  
22 follow-up and timing of repeat CMR was intended to reflect the longer-term follow-  
23 up in the main trial.

24 PRAMI participants who were eligible for CMR were prospectively invited by the  
25 clinical research staff to participate and all of the participants provided written  
26 informed consent. In January 2013, enrolment in the PRAMI trial was stopped on the  
27 recommendation of the Data and Safety Monitoring Committee because of highly  
28 statistically significant between-group difference in the incidence of the primary  
29 outcome in favour of preventive PCI and further enrolment in the trial would not  
30 result in a change in this result.

### 31 **Participants and Eligibility**

32 The eligibility criteria for the CMR study were:

#### 33 *Inclusion criteria*

34 1. Informed consent for the PRAMI trial.

#### 35 *Exclusion criteria*

- 36 1. Implanted medical devices: e.g. pacemakers, cochlear implants.
- 37 2. Intra-cranial foreign bodies.
- 38 3. Cardiogenic shock.

39 Patients with a severe reduction in renal function (i.e. a glomerular filtration rate <30  
40 mL/min/1.73m<sup>2</sup>) were eligible for CMR although administration of the gadolinium

41 contrast agent was not permitted. A safety checklist was completed prior to the CMR  
42 examination.

### 43 **CMR acquisition**

44 The long-term duration of CMR follow-up was intended to reflect the duration of  
45 follow-up in the main trial, and so provide longer term information on infarct size  
46 (including de novo infarction) and LV function and remodelling that might be  
47 associated with each of the randomised treatment strategies.

### 48 **CMR methods**

#### 49 *Cardiac MR image acquisition*

50 CMR was performed on Siemens MAGNETOM Avanto (Erlangen, Germany) 1.5-  
51 Tesla scanners with a 12-element phased array cardiac surface coil.

52 LV dimensions were assessed using retro-gated balanced steady state free precession  
53 cinematographic breath-hold sequences. The in-plane resolution was approximately 2  
54 mm (26  $\mu$ l/voxel) and the temporal resolution was approximately 40 ms within the  
55 cardiac cycle. The heart was imaged in multiple parallel short-axis (SAX) planes 8-  
56 mm thick separated by 2-mm gaps, as well as in the 2-chamber, 3-chamber, and 4-  
57 chamber long-axis views.

58 Myocardial infarction was imaged using turbo fast low-angle shot (Turbo-FLASH)  
59 with or without segmented phase-sensitive inversion recovery (PSIR). Infarction was  
60 assessed 15 minutes after intravenous injection of 0.15 mmol/kg of gadoterate

61 meglumine (Gd<sup>2+</sup>-DOTA, Dotarem, Guebert S.A.). Imaging parameters were as  
62 previously described (1).

### 63 *Infarct definition and size*

64 Infarction was defined by the occurrence of myocardial late gadolinium enhancement  
65 revealed in orthogonal planes including phase swap acquisitions as appropriate to rule  
66 out artefact. Acute infarction was defined as a territory of infarct scar that was not  
67 associated with myocardial wall thinning on cinematographic sequences. The  
68 myocardial mass of late gadolinium (grams) was quantified using computer assisted  
69 planimetry and the territory of infarction was delineated using a signal intensity  
70 threshold of >5 standard deviations above a remote reference region and expressed as  
71 a percentage of total LV mass. The occurrence of infarction in non-culprit artery  
72 territories at baseline and during longer-term follow-up was assessed by late  
73 gadolinium enhancement imaging, and in addition to regional wall motion, features  
74 consistent with acute myocardial infarction i.e. myocardial oedema revealed by T2-  
75 weighted CMR, or chronic myocardial infarction i.e. wall thinning, were also  
76 assessed. Infarct regions with evidence of microvascular obstruction (MVO) were  
77 included within the infarct area and the area of MVO was assessed separately and also  
78 as a percentage of total LV mass. LGE sequences were reviewed by K.M. and C.B.  
79 (as a senior observer with > 10 years CMR experience) to identify non-IRA infarcts.

### 80 *Adverse remodelling*

81 Adverse remodelling was defined as an increase in LV end-diastolic volume and end  
82 systolic volume  $\geq 20\%$  on the follow-up CMR scan versus baseline early post-MI.

83 *Myocardial oedema*

84 T2-weighted CMR was used to assess for the presence or absence of myocardial  
85 oedema involving a full stack of short axis LV scans to cover the whole of the LV.  
86 Two T2-weighted sequences were used to assess myocardial oedema, the bright-blood  
87 T2-weighted ACUT2E method (Acquisition for Cardiac Unified T2 Edema) (2). T2  
88 mapping was acquired using an investigational prototype T2-prepared (T2P) balanced  
89 steady state free precession sequence in 13 of the patients.

90 Typical imaging parameters were as previously described (1) Myocardial tissue with a  
91 signal intensity at least 2 SD above the mean signal obtained in the remote non-  
92 infarcted myocardium was considered hyperintense and consistent with oedema.  
93 Hyperintense zones were assessed by a cardiologist (K.M.) who was blinded to the  
94 angiographic data. The presence of oedema in association with late gadolinium  
95 enhancement was taken supporting evidence of acute infarction.

96 **Quantitative Coronary Analysis-supplementary information**

97 The minimum vessel diameter used in the analysis was 2 mm, and a minimum  
98 stenosis threshold used in QCA analysis was 50%. Intra-procedural thrombotic events  
99 were classified as per published guidelines (3). Syntax scores were calculated before  
100 and after PCI using version 2.11 of the online Syntax Score Calculator. The Alberta  
101 Provincial Project for Outcome Assessment in Coronary Heart Disease  
102 (APPROACH) score was used to describe the percentage of myocardium at risk based  
103 on visual and QCA estimation of stenosis  $\geq 50\%$  and before and after PCI (4).  
104 Coronary angiograms were assessed for the presence of chronic total occlusions  
105 (CTO) and TIMI flow grade was assessed before and after PCI. The prognosis in

106 patients undergoing PCI is known to relate to the number of complex plaques as  
107 defined by pre-specified criteria (5). In this study lesions were considered complex if  
108 they had at least 50% visually assessed diameter stenosis associated with at least two  
109 of the following;

- 110 • A filling defect
- 111 • Clear evidence of thrombus,
- 112 • Plaque ulceration
- 113 • Plaque irregularity
- 114 • TIMI flow <3
- 115 • Involvement of a bifurcation lesion
- 116 • Angiographic evidence of heavy calcification

## 117 **Results**

### 118 **CMR findings- supplementary results.**

119 There was no difference in the timing of PCI between both arms at baseline (p=  
120 0.432) or follow-up (p=0.538).

121 On follow-up imaging, there were an additional 2 (4.8%) new cases of non-infarct  
122 artery related late gadolinium enhancement in the culprit-artery-only arm. In these  
123 cases, retrospective review of the coronary angiograms revealed coronary artery  
124 lesions >50% stenosis severity that, according to the PRAMI protocol, would have

125 been treated immediately by preventive PCI at the time of the index procedure if the  
126 patient had been randomised to that group. One of these patients was treated with PCI  
127 3 months post-randomisation and the new infarction in this territory was consistent  
128 with peri-procedural infarction.

129 LV ejection fraction, LV volumes, and the proportion of patients with adverse  
130 remodelling were similar between groups, ( $p > 0.05$ ) (Table 3).

131 Six (7%) participants (1 from the culprit-artery only group and 5 from the preventive  
132 PCI group) did not attend for the follow-up CMR scan, and 6 patients died, including  
133 2 from cardiac causes (Table 4). Follow-up was from randomization up till 31<sup>st</sup>  
134 December 2015. The median (interquartile range) follow-up time was 59.1 months  
135 (51.5, 67.3) for the culprit-artery only group, and 57.1 months (43.1, 66.3) for the  
136 preventive PCI group.

**References.**

- 138 1. Payne AR, Berry C, Doolin O, McEntegart M, Petrie MC, Lindsay MM, et al.  
139 Microvascular Resistance Predicts Myocardial Salvage and Infarct  
140 Characteristics in ST-Elevation Myocardial Infarction. *J Am Heart Assoc.* 2012  
141 Aug;1(4):e002246.
- 142 2. Aletras AH, Kellman P, Derbyshire JA, Arai AE. ACUT2E TSE-SSFP: a hybrid  
143 method for T2-weighted imaging of edema in the heart. *Magn Reson Med Off J*  
144 *Soc Magn Reson Med Soc Magn Reson Med.* 2008 Feb;59(2):229–35.
- 145 3. McEntegart MB, Kirtane AJ, Cristea E, Brener S, Mehran R, Fahy M, et al.  
146 Intraprocedural thrombotic events during percutaneous coronary intervention in  
147 patients with non-ST-segment elevation acute coronary syndromes are  
148 associated with adverse outcomes: analysis from the ACUTY (Acute  
149 Catheterization and Urgent Intervention Triage Strategy) trial. *J Am Coll*  
150 *Cardiol.* 2012 May 15;59(20):1745–51.
- 151 4. Ortiz-Pérez JT, Meyers SN, Lee DC, Kansal P, Klocke FJ, Holly TA, et al.  
152 Angiographic estimates of myocardium at risk during acute myocardial  
153 infarction: validation study using cardiac magnetic resonance imaging. *Eur*  
154 *Heart J.* 2007 Jul;28(14):1750–8.
- 155 5. Goldstein JA, Demetriou D, Grines CL, Pica M, Shoukfeh M, O’Neill WW.  
156 Multiple complex coronary plaques in patients with acute myocardial infarction.  
157 *N Engl J Med.* 2000 Sep 28;343(13):915–22.



**Supplementary Table 1: Image Quality Scoring**

| Baseline CMR   | Cine                                                                       | T2-weighted | LGE      |
|----------------|----------------------------------------------------------------------------|-------------|----------|
| n=84           |                                                                            |             |          |
| High quality   | 80 (95%)                                                                   | 79 (94%)    | 73 (87%) |
| Adequate       | 4 (5%)                                                                     | 3 (4%)      | 9 (11%)  |
| Non-diagnostic | 0 (0%)                                                                     | 0 (0%)      | 0 (0%)   |
| Missing data   | 0(0%)                                                                      | 2 (2%)      | 2 (2%)   |
| Follow-up CMR  | Cine                                                                       | T2-weighted | LGE      |
| n=72           |                                                                            |             |          |
| High quality   | 68 (94%)                                                                   | 58 (81%)    | 68 (94%) |
| Adequate       | 4 (6%)                                                                     | 3 (4%)      | 4 (6%)   |
| Non-diagnostic | 0 (0%)                                                                     | 0 (0%)      | 0 (0%)   |
| Missing data   | 0 (0%)                                                                     | 11 (15%)    | 0 (0%)   |
| High Quality   | Well-defined endo- and epi-cardial borders (i.e. good ECG gating)          |             |          |
|                | No flow artefact                                                           |             |          |
|                | No SSFP artefact within myocardium                                         |             |          |
|                | No ghosting due to patient breathing                                       |             |          |
| Adequate       | One or more of the following are present:                                  |             |          |
|                | Slight blurring of endo- and epi-cardial borders                           |             |          |
|                | Slight artefact due to flow within blood pool but not affecting myocardium |             |          |
|                | SSFP artefact just within myocardium                                       |             |          |
|                | Slight ghosting due to patient breathing                                   |             |          |
| Non-diagnostic | One of more of the following are present:                                  |             |          |

Substantial blurring of the endo- and epi-cardial  
borders due to poor ECG gating

Substantial flow artefact within myocardium

Substantial SSFP artefact obscuring myocardium

Substantial ghosting due to patient breathing

---

**Supplementary Table 2. Within subject change in LV end-diastolic volume index, and LV end-systolic volume index.**

| Follow-up CMR                                         | n = 37 (50%)         | n = 35 (50%)        | p value |
|-------------------------------------------------------|----------------------|---------------------|---------|
| Within subject $\Delta$ LV end-diastolic volume index |                      |                     |         |
| Median (IQR)                                          | -1.40 (-15.20, 6.25) | 1.05 (12.57)        | 0.19    |
| Mean (SD)                                             | -3.85 (14.34)        | 0.43 (12.57)        | -       |
| Within subject $\Delta$ LV end-systolic volume index  |                      |                     |         |
| Median (IQR)                                          | -5.40 (-13.90, 1.00) | -2.20 (-7.78, 9.62) | 0.10    |
| Mean (SD)                                             | -6.57 (10.95)        | -3.12 (10.28)       | -       |

IQR- interquartile range. SD- standard deviation
